# Supplementary material for: The Expression of FAP in Hepatocellular Carcinoma Cells is Induced by Hypoxia and Correlates with Poor Clinical Outcomes
Source: PubMed Central journal article supplement — J Cancer. 2018 Sep 7;9(18):3278–86. doi: 10.7150/jca.25775 (PMC6160687; doi:10.7150/jca.25775), 2018-09-07
Supplement: jcav09p3278s1.pdf [file jcav09p3278s1.pdf]

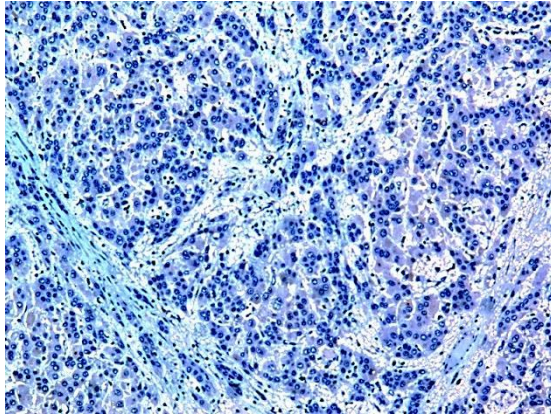

Figure S1. The negative control in IHC staining (incubated with secondary antibody only).

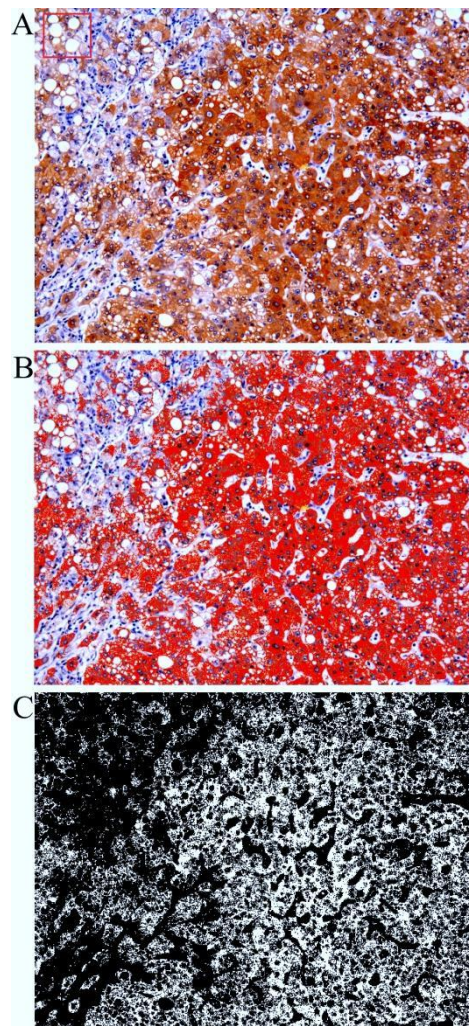

Fig S2. Representative images for the process of measuring the IOD for FAP staining in IHC. (A) The original image of a representative tissue slice stained with FAP, taken under microscope ( $\times 100$ ). Within the small red rectangle, the white area was set as the background noise. (B) The positive staining was marked as the color of interest and masked in red. Integrated optical density (IOD) of the positively staining area was measured using the computer in the Image-Pro Plus v6.0 software, and the mean IOD represents the expression level of FAP in the tissue. (C) The unchosen area is masked in black.
